# Supplementary material
Source: PubMed Central journal article supplement (PMC3024124)
Supplement: embor2010185s2.pdf [file embor2010185s2.pdf]

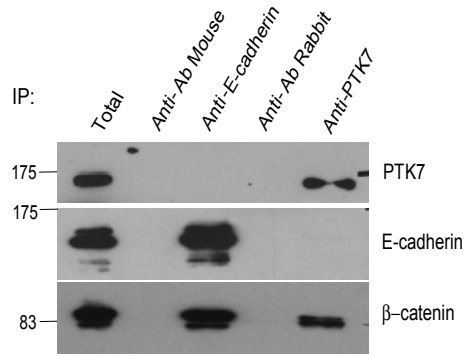

**Supplementary Figure 1:** After transfection of  $\beta$ -catenin and PTK7 expressing plasmids in MDCK cells, total proteins extracted were immunoprecipitated with anti-E-cadherin or anti-PTK7 antibodies and bound proteins were revealed by western blot with the mentioned antibodies (E-cadherin, PTK7,  $\beta$ -catenin).

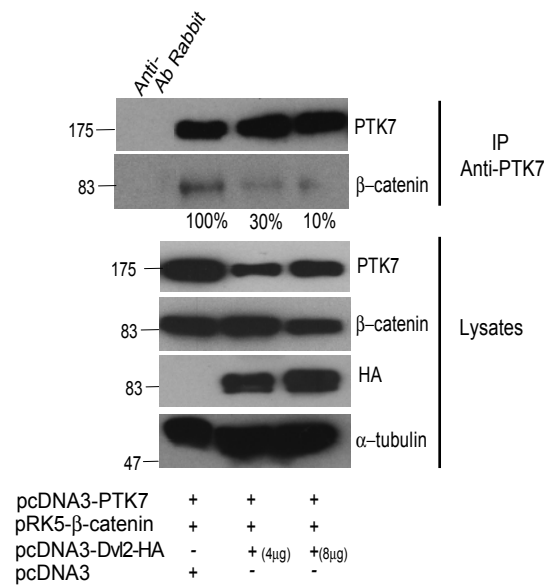

**Supplementary Figure 2:** In MDCK cells, transfection of  $\beta$ -catenin, PTK7 and different amounts (4 and 8  $\mu$ g) of Dvl2-HA expressing plasmids or pcDNA3 empty vector was followed by total proteins extraction and immunoprecipitation with anti-PTK7 antibody. Bound proteins were revealed by western blot with the mentioned antibodies (PTK7,  $\beta$ -catenin). Densitometric analysis of the co-immunoprecipitated  $\beta$ -catenin is expressed as percentage of  $\beta$ -catenin bound to PTK7, normalized with the amount of PTK7 and  $\beta$ -catenin present in the lysates. In the absence of Dishevelled, amount of co-immunoprecipitated  $\beta$ -catenin is considered as 100%. Total lysates were blotted using anti-PTK7, anti  $\beta$ -catenin, anti-HA and anti- $\alpha$ -tubulin (right panel) antibodies. Data shown are representative of at least three independent experiments.
